# Supplementary material
Source: ML conference proceedings conference paper supplement (https://proceedings.neurips.cc/paper_files/paper/2023/hash/45e604a3e33d10fba508e755faa72345-Abstract.html)
Supplement: Supplementary file 1 [file 45e604a3e33d10fba508e755faa72345-Supplemental-Datasets_and_Benchmarks.pdf]

## A More examples of image-text pairs (no cherry picking)

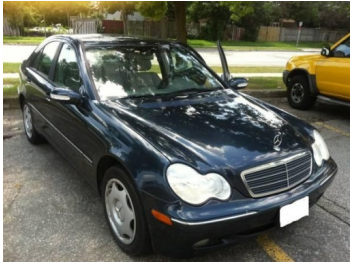

side of a road .

Raw: 2003 Mercedes-Benz C240 sedan, Leather, MUST BE SEEN - \$6199

BLIP (finetuned): a couple of cars parked in a parking lot with trees and cars

BLIP2: 2002 mercedes-benz c-class for sale

BLIP2 (finetuned): a blue mercedes benz car parked in a parking lot next to yellow cars

OpenCLIP-CoCa: find used 2 0 0 1 mercedes benz c 2 4 0 base sedan 4 door 2 5 l for 2 0 0 1 mercedes benz c 2

OpenCLIP-CoCa (finetuned): a blue mercedes parked on the

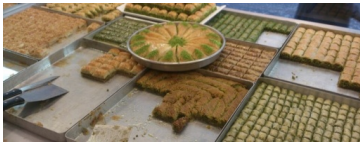

from the store

Raw: Gaziburma Ünal is one of Gespeicherte Orte von Can.

BLIP (finetuned): dozens of trays of different types of treats at a food stand

BLIP2: some trays of pastries and a knife

BLIP2 (finetuned): there are many trays filled with food items

OpenCLIP-CoCa: baklava , sweets , pastries

OpenCLIP-CoCa (finetuned): there are trays full of different types of food .

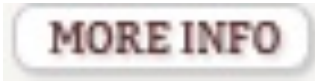

BLIP2: a white button with the word more info

BLIP2 (finetuned): more information is shown on a white button with an orange background

OpenCLIP-CoCa: home - page - button . png

OpenCLIP-CoCa (finetuned): a picture of a close up of a text message

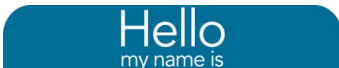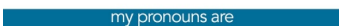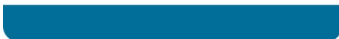

OpenCLIP-CoCa (finetuned): hello my name is , my pronouns are .

Raw: 2016.07.01 Nametags with Pronouns - Avery 5392\_non-branded

BLIP (finetuned): there are no pictures here to provide a caption for

BLIP2: hello, my name is name, my pronouns are pronouns

BLIP2 (finetuned): a blue and white label with a blue and white text

OpenCLIP-CoCa: 1 5 + hello my name is names pronunciations and meanings

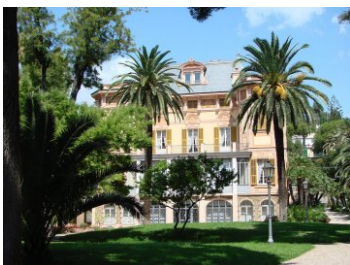

a bunch of palm trees .

Raw: Italien - Ligurien

BLIP (finetuned): beige colored building with tan accents and palm trees on both sides of walkway

BLIP2: house in villa marina, a villa with many rooms and palm trees

BLIP2 (finetuned): a park with lots of trees and benches in front of a large building

OpenCLIP-CoCa: residence - villa - maria - di - san - giovanni - near - the - sea - in - taormina

OpenCLIP-CoCa (finetuned): a picture of a large building with

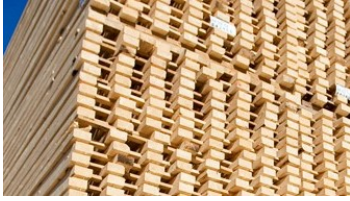

Raw: *3 formas de pedir la mano de tu novia - wikiHow*  
 BLIP (finetuned): *crates stacked up in a pile on top of each other*  
 BLIP2: *the building contains five floors of wooden planks*  
 BLIP2 (finetuned): *a big pile of wooden planks stacked together*  
 OpenCLIP-CoCa: *the cost of wood pallets*  
 OpenCLIP-CoCa (finetuned): *a large pile of wooden pallets mounted to a wall .*

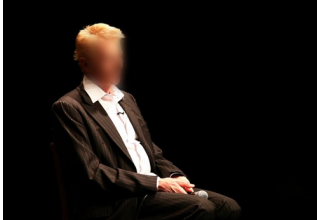

Raw: *lutz*  
 BLIP (finetuned): *blond haired man in black suit looking at camera*  
 BLIP2: *a man sitting on a chair with a blank background*  
 BLIP2 (finetuned): *a man sitting in a chair with a lapel button in front*  
 OpenCLIP-CoCa: *actor tilda swinton is pictured during a press conference for the film ' a dangerous method ' at the 2 0 1 1 toronto film festival*  
 OpenCLIP-CoCa (finetuned): *a person sitting on a chair wearing a suit and tie .*

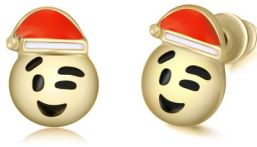

*face and a christmas hat .*

Raw: *Women Personality Creative Christmas Hat Face Expression Gold Earring Funny Cartoon Ear Stud Jewelry Accessories Gift Hot*  
 BLIP (finetuned): *red and gold tone emoji earring*  
 BLIP2: *kawaii santa emotivos en la cabeza*  
 BLIP2 (finetuned): *a pair of emoji earrings with faces and hats*  
 OpenCLIP-CoCa: *best christmas gift for her new arrivals emoji earrings christmas emoji earrings*  
 OpenCLIP-CoCa (finetuned): *a pair of gold earrings with a smiley*

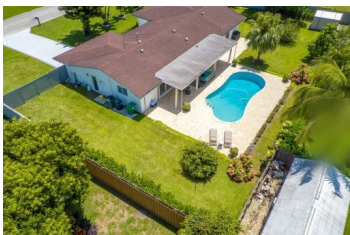

Raw: *10840 SW 126th St photo067*  
 BLIP (finetuned): *overview of a large backyard with a swimming pool and patio*  
 BLIP2: *3344 sw 7th st, palm beach*  
 BLIP2 (finetuned): *a house with a pool from above, with a yard*  
 OpenCLIP-CoCa: *home for sale in country club shores west palm beach florida*  
 OpenCLIP-CoCa (finetuned): *aerial image of a pool that has a little bit of shade by the side .*

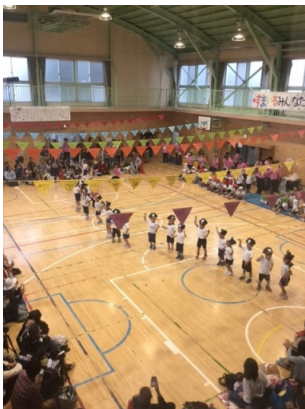

Raw: *image8.JPG*  
 BLIP (finetuned): *members of a school play soccer in a gymnasium with a crowd*  
 BLIP2: *a large crowd of kids perform during a dance show*  
 BLIP2 (finetuned): *a group of young children standing on the basketball court*  
 OpenCLIP-CoCa: *kid dressed in white standing in a gym area*  
 OpenCLIP-CoCa (finetuned): *a group of kids on the gym floor with fans on the floor .*

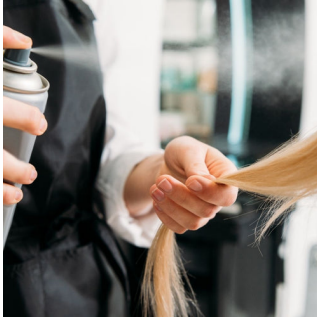

Raw: hair oil

BLIP (finetuned): smiling blonde woman blow drying hair in a salon while getting a mani

BLIP2: hair stylist using hair spray in beauty salon

BLIP2 (finetuned): a person is using a hairdryer to blow dry a long blonde hair

OpenCLIP-CoCa: female hairdresser styling a long blond hair with hairspray in a beauty salon . concept : hair care , hair straightening , hair color correction .

OpenCLIP-CoCa (finetuned): a person is spraying a hair dryer on a long blonde hair .

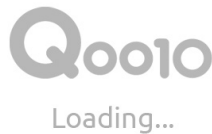

Raw: Women long sleeve t shirt 2015 Fashion shirts woman Full Comfortable leisure fashion womens long sleeve tops

BLIP (finetuned): the qaoo loading logo is shown above the qaoo loading logo

BLIP2: qoo10 loading logo on white

BLIP2 (finetuned): a picture of an image of a phone screen showing a loading sign

OpenCLIP-CoCa: loading \_ 1 1 1 2 0 \_ 0 1 . png

OpenCLIP-CoCa (finetuned): a light grey font and a dark grey font

with a large white background

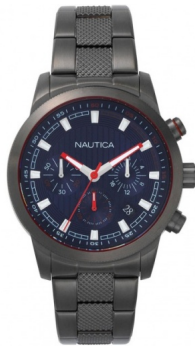

Raw: Nautica NAPTyr005

BLIP (finetuned): navitta mens stainless steel bracelet watch with blue dial

BLIP2: nautica men's chronograph watch

BLIP2 (finetuned): nautica men's men's chronograph black dial stainless steel bracelet watch

OpenCLIP-CoCa: nautica newport chronograph n 2 2 0 0 3 g

OpenCLIP-CoCa (finetuned): a mans black watch is shown with red and blue accents

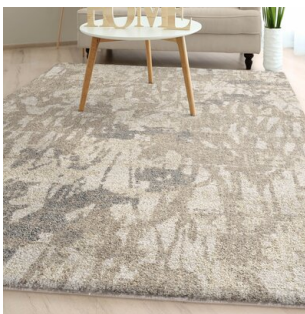

Raw: Greenberg Weathered Marble Plush Ivory Area Rug

BLIP (finetuned): grey rug with a text home on it by a table

BLIP2: a grey area rug on a wooden floor

BLIP2 (finetuned): a white coffee table with a sign saying home on it. it is sitting on a cream colored rug

OpenCLIP-CoCa: rugs and carpets in hyderabad : buy online at best price in ...

OpenCLIP-CoCa (finetuned): a rug is shown in a living room with a chair .

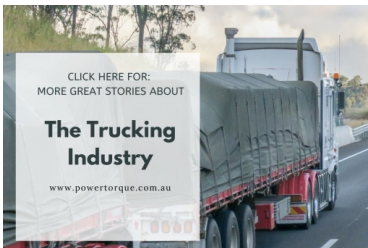

Raw: productivity, productivity, productivity

BLIP (finetuned): drivers guide to the truck industry

BLIP2: buy and sell truck parts

BLIP2 (finetuned): a white truck with a cover on it drives along a highway

OpenCLIP-CoCa: how the trucking industry is changing

OpenCLIP-CoCa (finetuned): there are some trucks on the road .

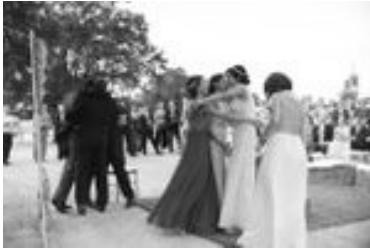

Raw: Amigas

BLIP (finetuned): crowd of people outside a wedding ceremony near several trees

BLIP2: a wedding ceremony in the middle of the street

BLIP2 (finetuned): a black and white photograph of a number of women in prom dresses

OpenCLIP-CoCa: 2 0 1 3 0 8 0 5 \_ wedding \_ carlenan \_ 0 0 3

OpenCLIP-CoCa (finetuned): a group of people hugging and talking in a group

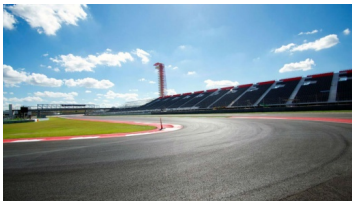

racing track

Raw: Autozone

BLIP (finetuned): racing track with a line of seats and a sky background

BLIP2: a photo of a grand prix race track, under a blue sky

BLIP2 (finetuned): the circuit track is empty, but the sun beams into the sky

OpenCLIP-CoCa: circuit of the americas

OpenCLIP-CoCa (finetuned): a red and white pole next to a

THE ARCTIC LIGHT

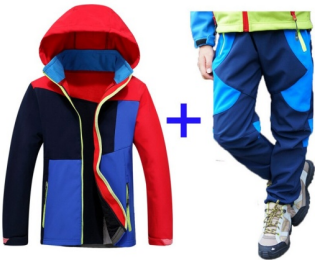

pants boys set

OpenCLIP-CoCa (finetuned): a child standing in their ski wear and a jacket and pants

Raw: Automne hiver enfants manteau et pantalon ensemble capuche veste de Ski et pantalon garçon fille coupe-vent imperméable en plein air camping randonnée

BLIP (finetuned): a man wearing a red and blue jacket and a pair of pants and a pair of sneakers

BLIP2: the arctic light hooded jacket and pants set

BLIP2 (finetuned): the colors of the jacket match the pant color of the jacket

OpenCLIP-CoCa: the arctic light 2 0 1 7 children 's clothing sets winter kids ski suits sets windproof waterproof warm jackets coats

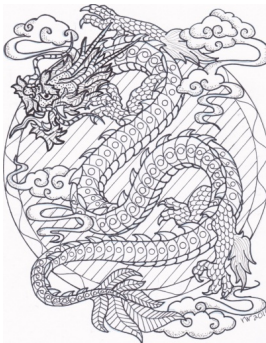

Raw: 1173x1500 Awesome Adult Coloring Pages Printable Zentangle Design

BLIP (finetuned): chinese dragon coloring pages dragon coloring pages for adults to print coloring pages

BLIP2: dragon coloring pages with large and large dragon

BLIP2 (finetuned): a circle with a dragon on it in the center

OpenCLIP-CoCa: the 2 5 best chinese dragon drawing ideas on pinterest chinese

OpenCLIP-CoCa (finetuned): a chinese dragon looks like a dragon from the movie the karate kid

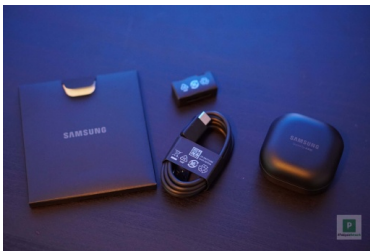

Raw: Der Lieferumfang

BLIP (finetuned): there are several electronics laid out on the table ready to be used

BLIP2: samsung galaxy s10e review | a quick tour of the samsung galaxy s10e

BLIP2 (finetuned): wireless charging case and remote control, both packaged in the box

OpenCLIP-CoCa: best - wireless - chargers - for - samsung - galaxy - note - 8 - s 8 - and - iphone - 8

OpenCLIP-CoCa (finetuned): a set of various electronic items sitting on a table .

## B Experiment details

Refer to Appendices M and N of the DataComp benchmark [18] for training and evaluation details. To summarize, both `small` and `medium` scales use ViT-B/32 as the image encoder for CLIP, in addition to fixing the hyperparameters used for training: learning rate  $5e-4$ , 500 warmup steps, batch size 4096, AdamW optimizer  $\beta_2 = 0.98$ . Large scale training uses the same hyperparameters, but with batch size 8192 and ViT-B/16 as the image encoder.

Using DataComp infrastructure and the AWS EC2 cloud, a `small` model takes 4 A100 hours to train, while `medium` requires 40 A100 hours and `large` utilizes 960 A100 hours. We additionally report CLIP ViT-L/14 and BLIP2 (OPT 2.7B backbone) inference costs. Recall that we run both of these models on the DataComp’s `large` pool to curate the datasets used in this paper. For the CLIP model, we measure throughput at 490 samples per second on a single A100. For BLIP2, we get 75 samples per second on the same hardware. Hence, for the `large` pool of 1.28B samples, we spend 725 A100 hours computing CLIP features and 4,740 A100 hours generating BLIP2 captions.

While the annotation cost (i.e., BLIP2 caption and CLIP score generation) is  $6\times$  larger than a single training run proposed by the DataComp benchmark (which is equivalent to going through the entire candidate pool for 1 epoch), this additional cost can be easily amortized with more training epochs over the final training set, as well as with training different downstream models on the improved dataset. For reference, OpenAI trained various CLIP models on the same set of 400M curated image-text pairs; the best performing model was trained on 256 GPUs for 2 weeks, totalling about 86,000 GPU hours [2]. This scale of training is common among existing large vision models. Future work could explore the option of adaptively allocating compute to CLIP training and synthetic caption annotation given a fixed compute budget.

## C Temperature ablations

| Captioning model          | Metric            | T=0.5 | T=0.75       | T=1.0        | T=1.5 |
|---------------------------|-------------------|-------|--------------|--------------|-------|
| BLIP (finetuned)          | ImageNet accuracy | -     | 0.207        | <b>0.212</b> | -     |
|                           | Average accuracy  | -     | 0.303        | <b>0.312</b> | -     |
| BLIP2                     | ImageNet accuracy | 0.212 | <b>0.281</b> | 0.280        | 0.251 |
|                           | Average accuracy  | 0.300 | <b>0.357</b> | 0.353        | 0.332 |
| BLIP2 (finetuned)         | ImageNet accuracy | -     | 0.227        | <b>0.234</b> | 0.221 |
|                           | Average accuracy  | -     | 0.325        | <b>0.326</b> | 0.311 |
| OpenCLIP-CoCa             | ImageNet accuracy | 0.306 | <b>0.321</b> | 0.314        | -     |
|                           | Average accuracy  | 0.366 | <b>0.371</b> | 0.370        | -     |
| OpenCLIP-CoCa (finetuned) | ImageNet accuracy | -     | 0.252        | <b>0.264</b> | 0.262 |
|                           | Average accuracy  | -     | 0.364        | <b>0.374</b> | 0.364 |

Table 2: Performance on ImageNet and averaged across 38 tasks when training on the captions generated by captioning models in Table 1 with different softmax temperatures. We find that  $T = 0.75$  and  $T = 1.0$  generally lead to good performance for CLIP training.

## D More filtering baselines

<sup>1</sup><https://openai.com/research/clip>

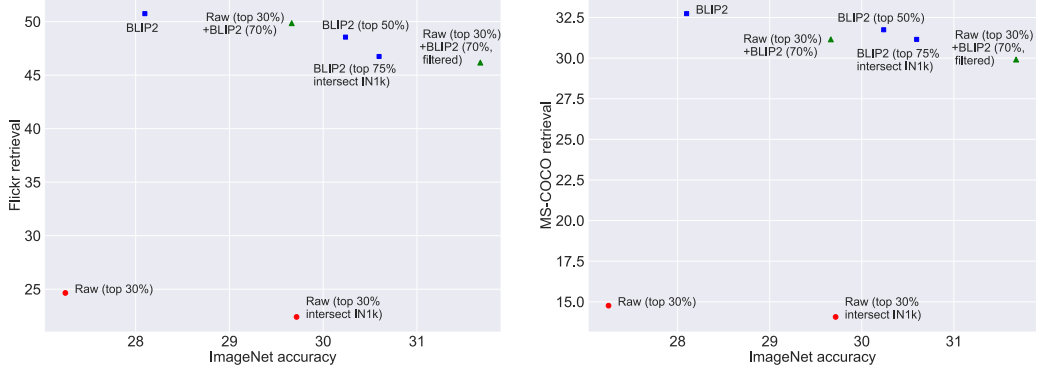

Figure 9: Retrieval performance on Flickr (left) and MS-COCO (right) versus ImageNet accuracy for select baselines. Similar to the findings in Figure 2, we find that using BLIP2 captions or including them in the training data with raw captions significantly boosts performance.

| Baseline                                                                | Training set size | ImageNet accuracy | Average accuracy |
|-------------------------------------------------------------------------|-------------------|-------------------|------------------|
| small scale (12.8M candidate pool, 12.8M training steps)                |                   |                   |                  |
| Raw captions (no filtering)                                             | 12.8M*            | 0.025*            | 0.132*           |
| BLIP2 captions (no filtering)                                           | 12.8M             | 0.076             | 0.200            |
| Raw captions (top 30%)                                                  | 3.8M*             | <u>0.051</u> *    | <u>0.173</u> *   |
| BLIP2 captions (top 50%)                                                | 6.4M              | <b>0.080</b>      | <b>0.203</b>     |
| Raw captions (intersect IN1k and top 30%)                               | 1.4M*             | 0.039*            | 0.144*           |
| BLIP2 captions (intersect IN1k and top 75%)                             | 2.4M              | 0.073             | 0.192            |
| Raw captions (top 30%) + BLIP2 captions (70%, filtered), intersect IN1k | 2.2M              | 0.045             | 0.153            |
| Raw captions (top 30%) + BLIP2 captions (70%, filtered)                 | 8.4M              | 0.076             | 0.197            |
| medium scale (128M candidate pool, 128M training steps)                 |                   |                   |                  |
| Raw captions (no filtering)                                             | 128M*             | 0.176*            | 0.258*           |
| BLIP2 captions (no filtering)                                           | 128M              | 0.281             | 0.357            |
| Top BLIP2 captions across all temperatures (no filtering)               | 128M              | 0.293             | 0.368            |
| Raw captions (top 30%)                                                  | 38M*              | 0.273*            | <u>0.328</u> *   |
| BLIP2 captions (top 50%)                                                | 64.1M             | 0.302             | 0.370            |
| Raw captions (intersect IN1k and top 30%)                               | 14.0M*            | <u>0.297</u> *    | <u>0.328</u> *   |
| BLIP2 captions (intersect IN1k and top 75%)                             | 23.6M             | 0.306             | 0.360            |
| Raw captions (top 30%) + BLIP2 captions (70%, filtered), intersect IN1k | 22.2M             | 0.281             | 0.314            |
| Raw captions (top 30%) + BLIP2 captions (70%, filtered)                 | 83.6M             | <b>0.317</b>      | 0.368            |
| BLIP2 captions (top 50%) + Raw captions (50%, filtered)                 | 75.3M             | 0.310             | <b>0.376</b>     |
| large scale (1.28B candidate pool, 1.28B training steps)                |                   |                   |                  |
| Raw captions (no filtering)                                             | 1.28B*            | 0.459*            | 0.437*           |
| BLIP2 captions (no filtering)                                           | 1.28B             | 0.487             | 0.505            |
| Raw captions (top 30%)                                                  | 384M*             | 0.578*            | 0.529*           |
| BLIP2 captions (top 50%)                                                | 641M              | 0.526             | 0.522            |
| Raw captions (intersect IN1k and top 30%)                               | 140M*             | <u>0.631</u> *    | <u>0.537</u> *   |
| BLIP2 captions (intersect IN1k and top 75%)                             | 237M              | 0.533             | 0.527            |
| Raw captions (top 30%) + BLIP2 captions (70%, filtered), intersect IN1k | 222M              | <b>0.643</b>      | 0.549            |
| Raw captions (top 30%) + BLIP2 captions (70%, filtered)                 | 834M              | 0.598             | <b>0.551</b>     |

Table 3: Performance for select baselines at small, medium and large scales of DataComp. \* indicates numbers obtained from the original paper [18]. Underlined numbers are best-performing baselines from the DataComp benchmark, trained on only raw web-crawled captions. Bolded numbers are the updated state-of-the-art figures after comparing with baselines involving synthetic captions. In general, given a fixed training budget, it is helpful to include more samples in the training pool by carefully replacing noisy raw captions with synthetic captions (i.e., RAW (TOP 30%) + BLIP2 (70%, FILTERED) versus RAW (TOP 30%)). We experiment with many more filtering and mixing methods at the medium scale and report how the performance varies with CLIP score filtering threshold, see Table 4.

| CLIP score filtering                                                                                                                       | 10%    | 20%    | 30%          | 50%          | 75%    | 90%    |
|--------------------------------------------------------------------------------------------------------------------------------------------|--------|--------|--------------|--------------|--------|--------|
| Cosine similarity threshold                                                                                                                |        |        |              |              |        |        |
| Raw captions                                                                                                                               | 0.295  | 0.266  | 0.243        | 0.203        | 0.160  | 0.129  |
| BLIP2 captions                                                                                                                             | 0.315  | 0.292  | 0.277        | 0.251        | 0.217  | 0.187  |
| Only raw captions                                                                                                                          |        |        |              |              |        |        |
| Training set size                                                                                                                          | 12.8M* | 25.7M* | 38.4M*       | 64.1M*       | 96.1M* | 115M*  |
| ImageNet accuracy                                                                                                                          | 0.198* | 0.260* | 0.273*       | 0.254*       | 0.212* | 0.188* |
| Average accuracy                                                                                                                           | 0.277* | 0.322* | 0.328*       | 0.315*       | 0.285* | 0.266* |
| Only BLIP2 captions                                                                                                                        |        |        |              |              |        |        |
| Training set size                                                                                                                          | 12.8M  | 25.6M  | 38.5M        | 64.1M        | 96.0M  | 115M   |
| ImageNet accuracy                                                                                                                          | 0.146  | 0.249  | 0.275        | 0.302        | 0.300  | 0.293  |
| Average accuracy                                                                                                                           | 0.254  | 0.333  | 0.356        | 0.370        | 0.365  | 0.366  |
| Only BLIP2 captions, for top % based on cosine similarity of image and <i>raw</i> text                                                     |        |        |              |              |        |        |
| Training set size                                                                                                                          | 12.8M  | 25.7M  | 38.4M        | 64.1M        | 96.1M  | 115M   |
| ImageNet accuracy                                                                                                                          | 0.192  | 0.245  | 0.261        | 0.266        | 0.267  | 0.276  |
| Average accuracy                                                                                                                           | 0.280  | 0.330  | 0.346        | 0.342        | 0.349  | 0.356  |
| Raw captions for top % + BLIP2 captions for the remaining examples                                                                         |        |        |              |              |        |        |
| Training set size                                                                                                                          | 128M   | 128M   | 128M         | 128M         | 128M   | 128M   |
| ImageNet accuracy                                                                                                                          | 0.286  | 0.296  | 0.297        | 0.286        | 0.250  | 0.215  |
| Average accuracy                                                                                                                           | 0.360  | 0.357  | 0.365        | 0.349        | 0.323  | 0.293  |
| Raw captions for top % + BLIP2 captions for the remaining examples,<br>subject to the same cosine similarity threshold                     |        |        |              |              |        |        |
| Training set size                                                                                                                          | 30.5M  | 59.5M  | 83.6M        | 114M         | 127M   | 128M   |
| ImageNet accuracy                                                                                                                          | 0.267  | 0.310  | <b>0.317</b> | 0.296        | 0.251  | 0.212  |
| Average accuracy                                                                                                                           | 0.343  | 0.372  | 0.368        | 0.352        | 0.313  | 0.285  |
| BLIP2 captions for top % + raw captions for the remaining examples,<br>subject to the same cosine similarity threshold                     |        |        |              |              |        |        |
| Training set size                                                                                                                          | 17.1M  | 32.8M  | 47.7M        | 75.3M        | 105M   | 121M   |
| ImageNet accuracy                                                                                                                          | 0.212  | 0.272  | 0.298        | 0.310        | 0.298  | 0.285  |
| Average accuracy                                                                                                                           | 0.305  | 0.353  | 0.367        | <b>0.376</b> | 0.375  | 0.355  |
| Concatenate raw & BLIP2 captions for top % + BLIP2 captions for the remaining examples,<br>subject to the same cosine similarity threshold |        |        |              |              |        |        |
| Training set size                                                                                                                          | 30.5M  | 59.5M  | 83.6M        | 114M         | 127M   | 128M   |
| ImageNet accuracy                                                                                                                          | 0.250  | 0.287  | 0.299        | 0.286        | 0.269  | 0.262  |
| Average accuracy                                                                                                                           | 0.336  | 0.368  | 0.367        | 0.359        | 0.340  | 0.337  |
| Top % raw captions + top % BLIP2 captions                                                                                                  |        |        |              |              |        |        |
| Training set size                                                                                                                          | 25.6M  | 51.3M  | 76.9M        | 128M         | -      | -      |
| ImageNet accuracy                                                                                                                          | 0.238  | 0.285  | 0.297        | 0.300        | -      | -      |
| Average accuracy                                                                                                                           | 0.318  | 0.358  | 0.366        | 0.356        | -      | -      |
| BLIP2 captions - top % intersect with examples from IN1k clustering                                                                        |        |        |              |              |        |        |
| Training set size                                                                                                                          | -      | -      | 10.0M        | 16.4M        | 23.6M  | 27.1M  |
| ImageNet accuracy                                                                                                                          | -      | -      | 0.243        | 0.289        | 0.306  | 0.301  |
| Average accuracy                                                                                                                           | -      | -      | 0.310        | 0.343        | 0.360  | 0.344  |

Table 4: Summary of how various filtering and mixing strategies perform on ImageNet and on average across 38 evaluation tasks in DataComp, given a 128M candidate pool (medium scale). \* indicates numbers obtained from Gadre et al. [18]. Note that all resulting training sets are trained for a fixed number of steps (128M samples seen) and other training variables (e.g., architecture, hyperparameters) are kept constant. Synthetic captions are generated using pre-trained BLIP2 model with top-K sampling (K = 50) and softmax temperature 0.75. We find that at this scale, approaches that yield the best ImageNet and average accuracies leverage a combination of raw and synthetic captions.

## E Synthetic caption analysis

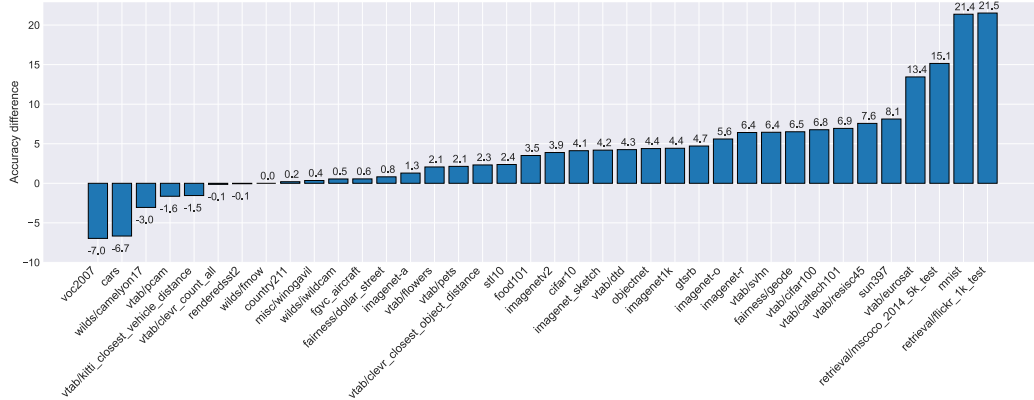

Figure 10: We find that expanding a training set of filtered raw data by using BLIP2 captions for some of the discarded images improves performance on 30 out of 38 evaluation tasks, in addition to boosting average accuracy by 4%. We compare performance on each task between training on top 30% of examples with raw captions (based on CLIP score) and training on the same set of examples but with the addition of BLIP2 captions for the remaining 70% images, filtered by the same CLIP score threshold. In Table 3 we have shown that adding BLIP2 captions improves ImageNet accuracy by 4.4% and average accuracy by 4%. With this breakdown, we find that the performance improvement applies to most of the tasks in the evaluation set, especially retrieval.

We investigate whether there are systematic differences in training with raw and generated text when it comes to recognizing certain object categories. To do so, we examine two CLIP models that perform similarly on ImageNet (i.e.,  $\pm 0.2\%$ ): one trained on only raw captions and one trained on only generated captions, both training sets have been filtered with CLIP score ranking to select the top 30% image-text pairs. In Figure 11 we analyze performance on each ImageNet class, categorized as either ‘living’ or ‘non-living’ thing based on where the classname synset is located in the WordNet hierarchy. We observe that class-wise classification performance is scattered evenly around the  $y = x$  line, indicating that compared to web-crawled captions, synthetic captions do not exhibit a particular disadvantage on either ‘living’ or ‘non-living’ concepts.

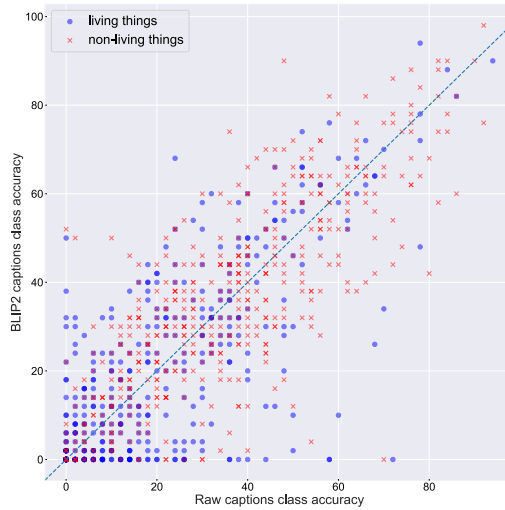

Figure 11: We break down per-class performance on ImageNet, between a CLIP model trained on only raw captions and one trained on only synthetic captions with similar overall ImageNet accuracy. We find no systematic trends in the performance of either model when it comes to classifying ‘living’ or ‘non-living’ things.

## F Performance at Scale

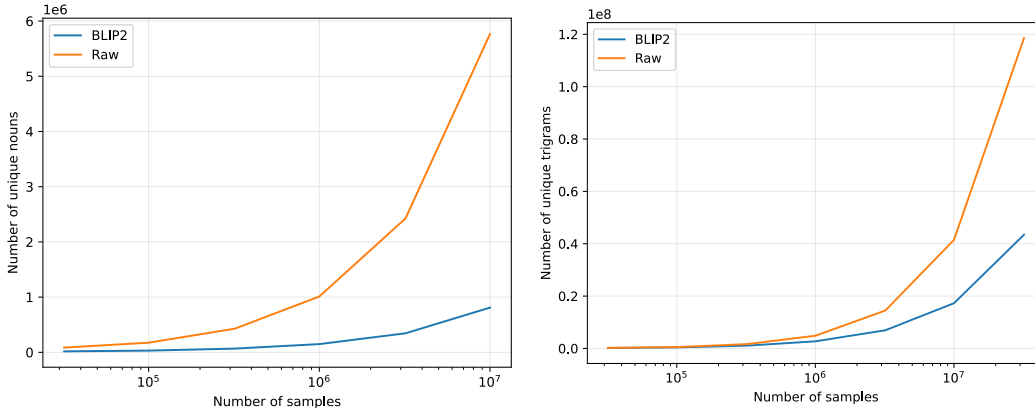

Figure 12: Our simple analyses of text properties suggest that the text diversity provided by synthetic captions may not scale as well as that of raw captions scraped from the Internet. We measure the number of unique nouns and unique trigrams for random subsets of BLIP2 and raw captions of various sizes. We observe that on both metrics, the scaling trend for synthetic captions is worse than that of raw captions. This increasing gap in data diversity may impact the performance benefits we can expect to obtain from using synthetic captions, when dealing with a larger scale of training data.

## G Experiments with LAION-COCO

Our experiments with synthetic captions are partly inspired by the release of LAION-COCO dataset [45], which used BLIP [29] with various hyperparameter settings to caption LAION-5B data [46], and then selected the top synthetic caption for each image based on the cosine similarity output by OpenAI’s CLIPs [40]. We pick a random set of 100M samples from LAION-COCO and train on this set using DataComp’s medium scale configuration (i.e., 128M steps), with either only the raw captions or only the top BLIP captions that come with the dataset. We find that training on BLIP captions significantly lags behind training on raw captions, measured by both ImageNet and average accuracies (Figure 13). Consequently, a natural question is how much of this gap can be overcome with progress in image captioning models, e.g. the release of BLIP2.

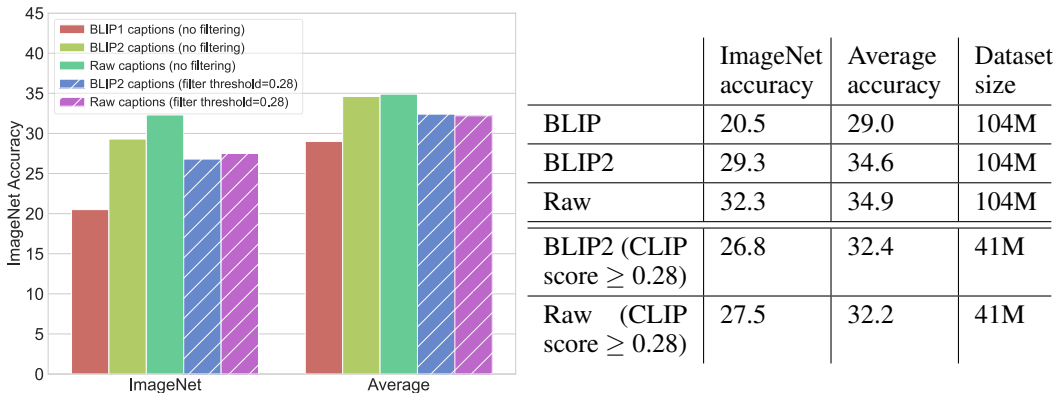

Figure 13: BLIP2 significantly closes the performance gap between BLIP captions and raw captions on LAION-COCO; when controlled for noise level, the performance difference between using BLIP2 and using raw captions is actually negligible. We use BLIP2 [30] to generate captions for 100M random samples from the LAION-COCO dataset [45], which already come with corresponding BLIP [29] captions. We find that advances in the BLIP model family help synthetic captions close the gap with raw captions, measured by the zero-shot performance of CLIP trained on the captions. After applying a cosine similarity threshold of 0.28 to the BLIP2 training pool, just like how LAION data was originally selected, we find that using either raw captions or synthetic captions for the resulting set of examples makes little difference (hatched columns).

We proceed to generating BLIP2 captions for the same set of 100M images, using only one configuration from the original hyperparameter grid in [45] due to compute constraints. Despite the lack of tuning, the new BLIP2 captions manage to close the previous ImageNet performance gap by 75% and come close to the average accuracy obtained from training on raw captions (see table in Figure 13). Since raw data in LAION was already filtered with a CLIP score threshold of 0.28 during the dataset construction, we next experiment with applying the same filtering to BLIP2 captions, in order to control for noise quality in the caption data. On the resulting 41M images, using BLIP2 captions is about as effective as using raw captions (-0.7% ImageNet accuracy and +0.2% average accuracy).

We note that LAION is considered a curated web dataset, with heavy cosine similarity filtering being one of the preprocessing steps. This in turn leads to approximately 90% of the raw data from Common Crawl to be discarded, according to Schuhmann et al. [46]. Since LAION only retains about 10% of the original candidate pool, similar experiments in DataComp [18] have shown that further CLIP score filtering on these top examples will only hurt performance. In addition, given that the selected raw captions are already relatively clean (measured via image-text cosine similarity), and there is no record of datapoints that were filtered out for further experimentation, we find LAION-COCO to be an unsuitable benchmark for studying the utility of synthetic captions. Our experiments here mainly seek to demonstrate that progress in image captioning models (e.g., the BLIP model family) can translate to better text supervision for CLIP training that rivals the effectiveness of using raw captions.

## H Fairness implications of using synthetic captions

We examine zero-shot classification accuracy of predicting race and gender from face images in the Fairface dataset [26], for a model trained on only filtered raw captions, one trained on only filtered synthetic captions, and one trained on both. We acknowledge that there are limitations to these evaluations as race and gender should not be considered fixed categories.

With Fairface, we find that using synthetic captions improves the classification performance on the disadvantaged group (e.g. female) significantly, and reduces the performance gap between male and female groups while still boosting the overall performance on all race categories. We leave more extensive study of the fairness implications of using synthetic data (including and beyond gender biases) to future work.

| Gender  | Model                                 | Race  |       |        |                     |                   |                     |               |
|---------|---------------------------------------|-------|-------|--------|---------------------|-------------------|---------------------|---------------|
|         |                                       | Black | White | Indian | Latino/<br>Hispanic | Middle<br>Eastern | South East<br>Asian | East<br>Asian |
| Male    | Raw (top 30%)                         | 93.0  | 88.8  | 91.2   | 90.8                | 92.3              | 85.3                | 81.3          |
|         | BLIP2 (top 30%)                       | 87.2  | 73.7  | 77.2   | 74.9                | 78.6              | 72.0                | 64.0          |
|         | Raw (top 30%) + BLIP2 (70%, filtered) | 90.5  | 75.0  | 79.7   | 79.4                | 81.1              | 72.4                | 65.3          |
| Female  | Raw (top 30%)                         | 20.3  | 47.1  | 35.1   | 42.0                | 40.9              | 44.9                | 56.8          |
|         | BLIP2 (top 30%)                       | 36.9  | 70.8  | 57.9   | 67.5                | 67.4              | 64.1                | 78.4          |
|         | Raw (top 30%) + BLIP2 (70%, filtered) | 32.9  | 74.8  | 56.5   | 66.3                | 67.9              | 67.8                | 81.9          |
| Overall | Raw (top 30%)                         | 56.7  | 68.0  | 63.2   | 66.4                | 66.6              | 65.1                | 69.1          |
|         | BLIP2 (top 30%)                       | 62.1  | 72.3  | 67.6   | 71.2                | 73.0              | 68.1                | 71.2          |
|         | Raw (top 30%) + BLIP2 (70%, filtered) | 61.7  | 74.9  | 68.1   | 72.9                | 74.5              | 70.1                | 73.6          |

Table 5: Using synthetic captions in the training mix improves classification performance on Fairface for the minority group (i.e. female) across all race categories.
